# Supplementary material for: Roles of Raft-Anchored Adaptor Cbp/PAG1 in Spatial Regulation of c-Src Kinase
Source: PLoS One. 2014 Mar 27;9(3):e93470. doi: 10.1371/journal.pone.0093470 (PMC3968143; doi:10.1371/journal.pone.0093470)
Supplement: Table S2 — Parameter values for the sequestration model with Vr = 0.1. (DOCX) [file pone.0093470.s007.docx]

**Table S2. Parameter values for the sequestration model with *Vr* = 0.1.**

| Symbol | Values | Units | Comments |
| --- | --- | --- | --- |
| *kc* | 10 | μM-1 s-1 | Fixed |
| *k_c* | 0.5 | s-1 | Fixed |
| *ks1* | 0.71 | μM-1 s-1 | Fitted |
| *k_s1* | 0.65 | s-1 | Fitted |
| *kp1* | 0.51 | s-1 | Fitted |
| *kd* | 0.005 | s-1 | Fitted |
| *kcin* | 0.36 | s-1 | Estimated from Figure 2 |
| *kcout* | 0.01 | s-1 | Estimated from Figure 2 |
| *ksin* | 0.1 | s-1 | Estimated from Figure 2 |
| *ksout* | 0.1 | s-1 | Estimated from Figure 2 |
| *kssin* | 0.01 | s-1 | Estimated from Figure 2 |
| *kssout* | 0.11 | s-1 | Estimated from Figure 2 |
| [FAK]tot | 0.05 | μM | Fixed |
